# Supplementary material for: Identification and Characterization of MmuPV1 Causing Papillomatosis Outbreak in an Animal Research Facility
Source: MDPI journal article supplement (doi:10.3390/v17091204), 2025-09-01
Supplement: s1 [file viruses-3815399-supplementary.pdf › viruses-3815399-supplementary.pdf]

CLUSTAL O(1.2.4) multiple sequence alignment

|           |                                                               |     |
|-----------|---------------------------------------------------------------|-----|
| HQ625439  | ATGGAGATCGGCAAAGGCTACACTCTCGAGGAGGTGCTTAGATATTCTAACAAAGATGTC  | 60  |
| NC_014326 | ATGGAAATCGGCAAAGGCTACACTCTCGAGGAGGTGCTTAGATATTCTAACAAAGATGTC  | 60  |
| PX123224  | ATGGAAATCGGCAAAGGCTACACTCTCGAGGAGGTGCTTAGATATTCTAACAAAGATGTC  | 60  |
| PX245442  | ATGGAAATCGGCAAAGGCTACACTCTCGAGGAGGTGCTTAGATATTCTAACAAAGATGTC  | 60  |
| *****     |                                                               |     |
| HQ625439  | GTGGATTTTCATTGTCTGTGCTTTTGTCTCTACTACTATGGATCATAACGAGAAGGCC    | 120 |
| NC_014326 | GTGGATTTTCATTGTCTGTGCTTTTGTCTCTACTACTATGGATCATAACGAGAAGGCC    | 120 |
| PX123224  | GTGGATTTTCATTGTCTGTGCTTTTGTCTCTACTACTATGGATCATAACGAGAAGGCC    | 120 |
| PX245442  | GTGGATTTTCATTGTCTGTGCTTTTGTCTCTACTACTATGGATCATAACGAGAAGGCC    | 120 |
| *****     |                                                               |     |
| HQ625439  | AGATTCCTTACATGCTAAATTGAAATGTGTTGTTAGAGATTTTGCTTTTAAAGGTGCTTGT | 180 |
| NC_014326 | AGATTCATACAGGCTAAATTGAAATGTGTTGTTAGAGATTTTGCTTTTAAAGGTGCTTGT  | 180 |
| PX123224  | AGATTCATACAGGCTAAATTGAAATGTGTTGTTAGAGATTTTGCTTTTAAAGGTGCTTGT  | 180 |
| PX245442  | AGATTCATACAGGCTAAATTGAAATGTGTTGTTAGAGATTTTGCTTTTAAAGGTGCTTGT  | 180 |
| *****     |                                                               |     |
| HQ625439  | ATTGTGTGCCGACAGACAGCTTGCTTGCAAGGAAAAGCTTTTGCATACTAGAGTTACAGGG | 240 |
| NC_014326 | ATTGTGTGCCGACAGACAGCTTGCTTGCAAGGAAAAGCTTTTGCATACTAGAGTTACAGGG | 240 |
| PX123224  | ATTGTGTGCCGACAGACAGCTTGCTTGCAAGGAAAAGCTTTTGCATACTAGAGTTACAGGG | 240 |
| PX245442  | ATTGTGTGCCGACAGACAGCTTGCTTGCAAGGAAAAGCTTTTGCATACTAGAGTTACAGGG | 240 |
| *****     |                                                               |     |
| HQ625439  | GAGGCTGATTTGGTAGAGTGCATGGCTGGTAAGAATATTGTGTTTGTACTGTAAGATGT   | 300 |
| NC_014326 | GAGGCTGATTTGGTAGAGTGCATGGCTGGCAAGAATATTGTGTTTGTACTGTAAGATGT   | 300 |
| PX123224  | GAGGCTGATTTGGTAGAGTGCATGGCTGGCAAGAATATTGTGTTTGTACTGTAAGATGT   | 300 |
| PX245442  | GAGGCTGATTTGGTAGAGTGCATGGCTGGCAAGAATATTGTGTTTGTACTGTAAGATGT   | 300 |
| *****     |                                                               |     |
| HQ625439  | GTTACGTGCCTGGCACTCCTTACTGCCTCTGAAAAGCTTGATGCCAAAGCGTGCGGCTTG  | 360 |
| NC_014326 | GTTACGTGCCTGGCACTCCTTACTGCCTCTGAAAAGCTTGATGCCAAAGCGTGCGGCTTG  | 360 |
| PX123224  | GTTACGTGCCTGGCACTCCTTACTGCCTCTGAAAAGCTTGATGCCAAAGCGTGCGGCTTG  | 360 |
| PX245442  | GTTACGTGCCTGGCACTCCTTACTGCCTCTGAAAAGCTTGATGCCAAAGCGTGCGGCTTG  | 360 |
| *****     |                                                               |     |
| HQ625439  | CCATTTCACTTGGTGCGCCACATGTGGAGAGGCTACTGCGGGTTCTGCAAACCATTACTA  | 420 |
| NC_014326 | CCATTTCACTTGGTGCGCCACATGTGGAGAGGCTACTGCGGGTTCTGCAAACCATTACTA  | 420 |
| PX123224  | CCATTTCACTTGGTGCGCCACATGTGGAGAGGCTACTGCGGGTTCTGCAAACCATTACTA  | 420 |
| PX245442  | CCATTTCACTTGGTGCGCCACATGTGGAGAGGCTACTGCGGGTTCTGCAAACCATTACTA  | 420 |
| *****     |                                                               |     |
| HQ625439  | TAATGCAGGGCCCATTACCAACAATTGCTGACATCGAGATTGAGAATCTCGACTCACTTT  | 480 |
| NC_014326 | TAATGCAGGGCCCATTACCAACAATTGCTGACATCGAGATTGAGAATCTCGACTCACTTT  | 480 |
| PX123224  | TAATGCAGGGCCCATTACCAACAATTGCTGACATCGAGATTGAGAATCTCGACTCACTTT  | 480 |
| PX245442  | TAATGCAGGGCCCATTACCAACAATTGCTGACATCGAGATTGAGAATCTCGACTCACTTT  | 480 |
| *****     |                                                               |     |
| HQ625439  | TGGGTGTTGGTGAGCCTGACCCACCCGATGTTGGGTCATCATCGTTGTCACCAGACTCGT  | 540 |
| NC_014326 | TGGGTGTTGGTGAGCCTGACCTACCCGATGTTGGGTCATCATCGTTGTCACCAGACTCGT  | 540 |
| PX123224  | TGGGTGTTGGTGAGCCTGACCTACCCGATGTTGGGTCATCATCGTTGTCACCAGACTCGT  | 540 |
| PX245442  | TGGGTGTTGGTGAGCCTGACCTACCCGATGTTGGGTCATCATCGTTGTCACCAGACTCGT  | 540 |
| *****     |                                                               |     |
| HQ625439  | TAGGAGAAGAGGAGGAGCTGGAGCTGGAGACTATCGATGTAGATCCTTACAGGATTAAAA  | 600 |
| NC_014326 | TAGGAGAAGAGGAGGAGCTGGAGCTGGAGACTATCGATGTAGATCCTTACAGGATTAAAA  | 600 |
| PX123224  | TAGGAGAAGAGGAGGAGCTGGAGCTGGAGACTATCGATGTAGATCCTTACAGGATTAAAA  | 600 |
| PX245442  | TAGGAGAAGAGGAGGAGCTGGAGCTGGAGACTATCGATGTAGATCCTTACAGGATTAAAA  | 600 |
| *****     |                                                               |     |

|           |                                                                           |      |
|-----------|---------------------------------------------------------------------------|------|
| HQ625439  | CAACCTGCTTTTGTGCGACACTGTTCTCCGGTTCATAATTGTGACCGGAGACGACTCGG               | 660  |
| NC_014326 | CAACCTGCTTTTGTGCGACACTGTTCTCCGGTTCATAATTGTGACCGGAGACGACTCGG               | 660  |
| PX123224  | CAACCTGCTTTTGTGCGACACTGTTCTCCGGTTCATAATTGTGACCGGAGACGACTCGG               | 660  |
| PX245442  | CAACCTGCTTTTGTGCGACACTGTTCTCCGGTTCATAATTGTGACCGGAGACGACTCGG<br>*****      | 660  |
| HQ625439  | TGAAGGCATTGAGTCACTGCTTCTGCAGGATCTTAGCTTTCTCTGCCCACTGCGTCG                 | 720  |
| NC_014326 | TGAAAGCATTGAGTCACTGCTTCTGCAGGATCTTAGCTTTGTCTGCCCGCACTGCGTCG               | 720  |
| PX123224  | TGAAAGCATTGAGTCACTGCTTCTGCAGGATCTTAGCTTTGTCTGCCCGCACTGCGTCG               | 720  |
| PX245442  | TGAAAGCATTGAGTCACTGCTTCTGCAGGATCTTAGCTTTGTCTGCCCGCACTGCGTCG<br>**** ***** | 720  |
| HQ625439  | CGTCGTACGTGAACCTCAGAAATGGAACGATAAAGGTACAGGGCAGTATTCTGGATGG                | 780  |
| NC_014326 | CGTCGTACGTGAACCTCAGAAATGGAACGATAAAGGTACAGGGCAGTATTCTGGATGG                | 780  |
| PX123224  | CGTCGTACGTGAACCTCAGAAATGGAACGATAAAGGTACAGGGCAGTATTCTGGATGG                | 780  |
| PX245442  | CGTCGTACGTGAACCTCAGAAATGGAACGATAAAGGTACAGGGCAGTATTCTGGATGG<br>*****       | 780  |
| HQ625439  | TGTTTTATAGATAATGAGGCTGAATGTGTGGATGATGTGGGTTCCTTGGATAACTTAGAG              | 840  |
| NC_014326 | TGTTTTATAGATAATGAGGCTGAATGTGTGGATGATGTGGGTTCCTTGGATAACTTAGAG              | 840  |
| PX123224  | TGTTTTATAGATAATGAGGCTGAATGTGTGGATGATGTGGGTTCCTTGGATAACTTAGAG              | 840  |
| PX245442  | TGTTTTATAGATAATGAGGCTGAATGTGTGGATGATGTGGGTTCCTTGGATAACTTAGAG<br>*****     | 840  |
| HQ625439  | GCATTGTTTGTGAGCAGAGTACCCAGGGATCATTGACAGTATGAGGTGGATCAGGGA                 | 900  |
| NC_014326 | GCATTGTTTGTGAGCAGAGTACCCAGGGATCATTGACAGTATGAGGTGGATCAGGGA                 | 900  |
| PX123224  | GCATTGTTTGTGAGCAGAGTACCCAGGGATCATTGACAGTATGAGGTGGATCAGGGA                 | 900  |
| PX245442  | GCATTGTTTGTGAGCAGAGTACCCAGGGATCATTGACAGTATGAGGTGGATCAGGGA<br>*****        | 900  |
| HQ625439  | AATTCCTTGGCATTGCTTTCAGAGCAGTTATTTGCAACTGATGAGCAACAGATTGCAGCC              | 960  |
| NC_014326 | AATTCCTTGGCATTGCTTTCAGAGCAGTTATTTGCAACTGATGAGCAACAGATTGCAGCC              | 960  |
| PX123224  | AATTCCTTGGCATTGCTTTCAGAGCAGTTATTTGCAACTGATGAGCAACAGATTGCAGCC              | 960  |
| PX245442  | AATTCCTTGGCATTGCTTTCAGAGCAGTTATTTGCAACTGATGAGCAACAGATTGCAGCC<br>*****     | 960  |
| HQ625439  | CTAAAACGAAAGTATGCCGCGACACCTAAGAAAAAACGGTAGAAATCGAAAATCTGAGT               | 1020 |
| NC_014326 | CTAAAACGAAAGTATGCCGCGACACCTAAGAAAAAACGGTAGAAATCGAAAATCTGAGT               | 1020 |
| PX123224  | CTAAAACGAAAGTATGCCGCGACACCTAAGAAAAAACGGTAGAAATCGAAAATCTGAGT               | 1020 |
| PX245442  | CTAAAACGAAAGTATGCCGCGACACCTAAGAAAAAACGGTAGAAATCGAAAATCTGAGT<br>*****      | 1020 |
| HQ625439  | CCTAGACTAGAGTCCGTCAGCATTTACCTAAAGGAAAGAGCAGGAGACGGTTGTTTGAC               | 1080 |
| NC_014326 | CCTAGATTAGAGTCCGTCAGCATTTACCTAAAGGAAAGAGCAGGAGACGGTTGTTTGAC               | 1080 |
| PX123224  | CCTAGATTAGAGTCCGTCAGCATTTACCTAAAGGAAAGAGCAGGAGACGGTTGTTTGAC               | 1080 |
| PX245442  | CCTAGATTAGAGTCCGTCAGCATTTACCTAAAGGAAAGAGCAGGAGACGGTTGTTTGAC<br>*****      | 1080 |
| HQ625439  | AGCGGAATAGGACATGAAACTCAAGATACTCCTTCGGGGAGCGAGGTACCTATGAGCATA              | 1140 |
| NC_014326 | AGCGGAATAGGACATGAAACTCAAGATACTCCTTCGGGGAGCGAGGTACCTATGAGCATA              | 1140 |
| PX123224  | AGCGGAATAGGACATGAAACTCAAGATACTCCTTCGGGGAGCGAGGTACCTATGAGCATA              | 1140 |
| PX245442  | AGCGGAATAGGACATGAAACTCAAGATACTCCTTCGGGGAGCGAGGTACCTATGAGCATA<br>*****     | 1140 |
| HQ625439  | TCTGGGTCTAGTTCAGCCAATTCAAGCATAGGAAGCCAGTGCAGAGCGAGCAGGTAAAT               | 1200 |
| NC_014326 | TCTGGGTCTAGTTCAGCCAATTCAAGCATAGGAAGCCAGTGCAGAGCGAGCAGGTAAAT               | 1200 |
| PX123224  | TCTGGGTCTAGTTCAGCCAATTCAAGCATAGGAAGCCAGTGCAGAGCGAGCAGGTAAAT               | 1200 |
| PX245442  | TCTGGGTCTAGTTCAGCCAATTCAAGCATAGGAAGCCAGTGCAGAGCGAGCAGGTAAAT<br>*****      | 1200 |

|           |                                                                        |      |
|-----------|------------------------------------------------------------------------|------|
| HQ625439  | AGTAACACTTTGATTTCTTCTGAAGATTGCTTAGAACAAGTAATAGATTGGCAGGGTGC            | 1260 |
| NC_014326 | AGTAACACTTTGATTTCTTCTGAAGATTGCTTAGAACAAGTAATAGATTGGCAGGGTGC            | 1260 |
| PX123224  | AGTAACACTTTGATTTCTTCTGAAGATTGCTTAGAACAAGTAATAGATTGGCAGGGTGC            | 1260 |
| PX245442  | AGTAACACTTTGATTTCTTCTGAAGATTGCTTAGAACAAGTAATAGATTGGCAGGGTGC<br>*****   | 1260 |
| HQ625439  | TATGCGAGGTTTAAGGAGGCATTGGGTGCAGCTTCACCGATCTAACGCGTAGCTTTAAG            | 1320 |
| NC_014326 | TATGCGAGGTTTAAGGAGGCATTGGGTGCAGCTTCACCGATCTAACGCGTAGCTTTAAG            | 1320 |
| PX123224  | TATGCGAGGTTTAAGGAGGCATTGGGTGCAGCTTCACCGATCTAACGCGTAGCTTTAAG            | 1320 |
| PX245442  | TATGCGAGGTTTAAGGAGGCATTGGGTGCAGCTTCACCGATCTAACGCGTAGCTTTAAG<br>*****   | 1320 |
| HQ625439  | AGTGATAAGACATGTAGTCCGAATTGGGTGCTAGCTGTGTTTGGGGCTAGAGAACATTG            | 1380 |
| NC_014326 | AGTGATAAGACATGTAGTCCGAATTGGGTGCTAGCTGTGTTTGGGGCTAGAGAACATTG            | 1380 |
| PX123224  | AGTGATAAGACATGTAGTCCGAATTGGGTGCTAGCTGTGTTTGGGGCTAGAGAACATTG            | 1380 |
| PX245442  | AGTGATAAGACATGTAGTCCGAATTGGGTGCTAGCTGTGTTTGGGGCTAGAGAACATTG<br>*****   | 1380 |
| HQ625439  | TTGCAGGCCTTACATGATGTGTGGAAGAACACCTATGAGTACTGCCAAGATACAACAAGT           | 1440 |
| NC_014326 | TTGCAGGCCTTACATGATGTGTGGAAGAACACCTATGAGTACTGCCAAGATACAACAAGT           | 1440 |
| PX123224  | TTGCAGGCCTTACATGATGTGTGGAAGAACACCTATGAGTACTGCCAAGATACAACAAGT           | 1440 |
| PX245442  | TTGCAGGCCTTACATGATGTGTGGAAGAACACCTATGAGTACTGCCAAGATACAACAAGT<br>*****  | 1440 |
| HQ625439  | TATGCAGGGAATAGAAAGGTGAACTTGCTGCTTATGGAGCTGAAGGTAGGTAGGAGCAGA           | 1500 |
| NC_014326 | TATGCAGGGAATAGAAAGGTGAACTTGCTGCTTATGGAGCTGAAGGTAGGTAGGAGCAGA           | 1500 |
| PX123224  | TATGCAGGGAATAGAAAGGTGAACTTGCTGCTTATGGAGCTGAAGGTAGGTAGGAGCAGA           | 1500 |
| PX245442  | TATGCAGGGAATAGAAAGGTGAACTTGCTGCTTATGGAGCTGAAGGTAGGTAGGAGCAGA<br>*****  | 1500 |
| HQ625439  | CTCACATTGCGGAGACAGCTTTCGCCATGTTAGGTGTGGATGAGTTGTTAATACTCGCC            | 1560 |
| NC_014326 | CTCACATTGCGGAGACAGCTTTCGCCATGTTAGGTGTGGATGAGTTGTTAATACTCGCC            | 1560 |
| PX123224  | CTCACATTGCGGAGACAGCTTTCGCCATGTTAGGTGTGGATGAGTTGTTAATACTCGCC            | 1560 |
| PX245442  | CTCACATTGCGGAGACAGCTTTCGCCATGTTAGGTGTGGATGAGTTGTTAATACTCGCC<br>*****   | 1560 |
| HQ625439  | GATCCGCCGAACGAGCGGAGCACGCTCGCCGCACTTTATTTTATAATAAGGTTTATTT             | 1620 |
| NC_014326 | GATCCGCCGAACGAGCGGAGCACGCTCGCCGCACTTTATTTTATAATAAGGTTTATTT             | 1620 |
| PX123224  | GATCCGCCGAACGAGCGGAGCACGCTCGCCGCACTTTATTTTATAATAAGGTTTATTT             | 1620 |
| PX245442  | GATCCGCCGAACGAGCGGAGCACGCTCGCCGCACTTTATTTTATAATAAGGTTTATTT<br>*****    | 1620 |
| HQ625439  | AAAAGTCCTTCTACCGTGTTTACGGTAGCACCCCGCTGTGGATAGCCAGCAAGACACTA            | 1680 |
| NC_014326 | AAAAGTCCTTCTACCATGTTTACGGTAGCACCCCGCTGTGGATAGCCAGCAAGACACTA            | 1680 |
| PX123224  | AAAAGTCCTTCTACCATGTTTACGGTAGCACCCCGCTGTGGATAGCCAGCAAGACACTA            | 1680 |
| PX245442  | AAAAGTCCTTCTACCATGTTTACGGTAGCACCCCGCTGTGGATAGCCAGCAAGACACTA<br>*****   | 1680 |
| HQ625439  | CTAGAGCATGCTAGTGCAACAGCCGAGTCCTTTGATTTTCAGTAGTATGGTGCAGTGGGCA          | 1740 |
| NC_014326 | CTAGAGCATGCTAGTGCAACAGCCGAGTCCTTTGATTTTCAGTAGTATGGTGCAGTGGGCA          | 1740 |
| PX123224  | CTAGAGCATGCTAGTGCAACAGCCGAGTCCTTTGATTTTCAGTAGTATGGTGCAGTGGGCA          | 1740 |
| PX245442  | CTAGAGCATGCTAGTGCAACAGCCGAGTCCTTTGATTTTCAGTAGTATGGTGCAGTGGGCA<br>***** | 1740 |
| HQ625439  | TATGACAATAGACTAAATGAGGAGGCAGAAATAGCTTATAAATATGCCTTAGAAGCAGAC           | 1800 |
| NC_014326 | TATGACAATAGACTAAATGAGGAGGCAGAAATAGCTTATAAATATGCCTTAGAAGCAGAC           | 1800 |
| PX123224  | TATGACAATAGACTAAATGAGGAGGCAGAAATAGCTTATAAATATGCCTTAGAAGCAGAC           | 1800 |
| PX245442  | TATGACAATAGACTAAATGAGGAGGCAGAAATAGCTTATAAATATGCCTTAGAAGCAGAC<br>*****  | 1800 |

|           |                                                                        |      |
|-----------|------------------------------------------------------------------------|------|
| HQ625439  | AGCAATAAGAATGCCCAAGCGTGGCTTAAGACTACAAACCAGGTAAAGCATGTCCGAGAC           | 1860 |
| NC_014326 | AGCAATAAGAATGCCCAAGCGTGGCTTAAGACTACAAACCAGGTAAAGCATGTCCGAGAC           | 1860 |
| PX123224  | AGCAATAAGAATGCCCAAGCGTGGCTTAAGACTACAAACCAGGTAAAGCATGTCCGAGAC           | 1860 |
| PX245442  | AGCAATAAGAATGCCCAAGCGTGGCTTAAGACTACAAACCAGGTAAAGCATGTCCGAGAC<br>*****  | 1860 |
| HQ625439  | TGCTGTGCAATGGTCAGGCTATATAACAGGCAGGAAATGAAGGAAATGACAATGGCTCAG           | 1920 |
| NC_014326 | TGCTGTGCAATGGTCAGGCTATATAACAGGCAGGAAATGAAGGAAATGACAATGGCTCAG           | 1920 |
| PX123224  | TGCTGTGCAATGGTCAGGCTATATAACAGGCAGGAAATGAAGGAAATGACAATGGCTCAG           | 1920 |
| PX245442  | TGCTGTGCAATGGTCAGGCTATATAACAGGCAGGAAATGAAGGAAATGACAATGGCTCAG<br>*****  | 1920 |
| HQ625439  | TGGATACGGAAGTGCTGCGATGAGACAGAGGAAGAAGGGGACTGGAAGGTTATTGCAAAC           | 1980 |
| NC_014326 | TGGATACGGAAGTGCTGCGATGAGACAGAGGAAGAAGGGGACTGGAAGGTTATTGCAAAC           | 1980 |
| PX123224  | TGGATACGGAAGTGCTGCGATGAGACAGAGGAAGAAGGGGACTGGAAGGTTATTGCAAAC           | 1980 |
| PX245442  | TGGATACGGAAGTGCTGCGATGAGACAGAGGAAGAAGGGGACTGGAAGGTTATTGCAAAC<br>*****  | 1980 |
| HQ625439  | TTCCCTTAGATACCAGGAAGTCAACCTCATACTGCTGCTTACAGCACTTAGGCATATGTTT          | 2040 |
| NC_014326 | TTCCCTTAGATACCAGGAAGTCAACCTCATACTGCTGCTTACAGCACTTAGGCATATGTTT          | 2040 |
| PX123224  | TTCCCTTAGATACCAGGAAGTCAACCTCATACTGCTGCTTACAGCACTTAGGCATATGTTT          | 2040 |
| PX245442  | TTCCCTTAGATACCAGGAAGTCAACCTCATACTGCTGCTTACAGCACTTAGGCATATGTTT<br>***** | 2040 |
| HQ625439  | AAGGGTACTCCTAAAAACACTGCCTCGTTATCACAGGTCCCCAGATACTGGGAAGTCA             | 2100 |
| NC_014326 | AAGGGTACTCCTAAAAACACTGCCTCGTTATCACAGGTCCCCAGATACTGGGAAGTCA             | 2100 |
| PX123224  | AAGGGTACTCCTAAAAACACTGCCTCGTTATCACAGGTCCCCAGATACTGGGAAGTCA             | 2100 |
| PX245442  | AAGGGTACTCCTAAAAACACTGCCTCGTTATCACAGGTCCCCAGATACTGGGAAGTCA<br>*****    | 2100 |
| HQ625439  | TATTTCTGTAATAGTCTGAATGGGTTTCTTAAAGGTCGTGTAATTTTCATTTATGAACAGT          | 2160 |
| NC_014326 | TATTTCTGTAATAGTCTGAATGGGTTTCTTAAAGGTCGTGTAATTTTCATTTATGAACAGT          | 2160 |
| PX123224  | TATTTCTGTAATAGTCTGAATGGGTTTCTTAAAGGTCGTGTAATTTTCATTTATGAACAGT          | 2160 |
| PX245442  | TATTTCTGTAATAGTCTGAATGGGTTTCTTAAAGGTCGTGTAATTTTCATTTATGAACAGT<br>***** | 2160 |
| HQ625439  | AGGAGTCAGTTCTGGCTGCAGCCTTTAGCAGATGCAAAAATGGGGTTCCTAGATGATGCT           | 2220 |
| NC_014326 | AGGAGTCAGTTCTGGCTGCAGCCTTTAGCAGATGCAAAAATGGGGTTCCTAGATGATGCT           | 2220 |
| PX123224  | AGGAGTCAGTTCTGGCTGCAGCCTTTAGCAGATGCAAAAATGGGGTTCCTAGATGATGCT           | 2220 |
| PX245442  | AGGAGTCAGTTCTGGCTGCAGCCTTTAGCAGATGCAAAAATGGGGTTCCTAGATGATGCT<br>*****  | 2220 |
| HQ625439  | ACAACCGCTTGCTGGAACCTTTGTGGATGTATATATGCGGAATGCATTAGATGGCAATCCC          | 2280 |
| NC_014326 | ACAACCGCTTGCTGGAACCTTTGTGGATGTATATATGCGGAATGCATTAGATGGCAATCCC          | 2280 |
| PX123224  | ACAACCGCTTGCTGGAACCTTTGTGGATGTATATATGCGGAATGCATTAGATGGCAATCCC          | 2280 |
| PX245442  | ACAACCGCTTGCTGGAACCTTTGTGGATGTATATATGCGGAATGCATTAGATGGCAATCCC<br>***** | 2280 |
| HQ625439  | ATGCAGCTTGACATTAAGCATAGAGCACCTTTGCAGCTTAAGCTACCTCCGCTACTAATT           | 2340 |
| NC_014326 | ATGCAGCTTGACATTAAGCATAGAGCACCTTTGCAGCTTAAGCTACCTCCGCTACTAATT           | 2340 |
| PX123224  | ATGCAGCTTGACATTAAGCATAGAGCACCTTTGCAGCTTAAGCTACCTCCGCTACTAATT           | 2340 |
| PX245442  | ATGCAGCTTGACATTAAGCATAGAGCACCTTTGCAGCTTAAGCTACCTCCGCTACTAATT<br>*****  | 2340 |
| HQ625439  | ACCTCAAATGTAGATGTCATGAATAATGACAATTTTCAGATATCTACATAGCAGGTTGCAG          | 2400 |
| NC_014326 | ACCTCAAATGTAGATGTCATGAATAATGACAATTTTCAGATATCTACATAGCAGGTTGCAG          | 2400 |
| PX123224  | ACCTCAAATGTAGATGTCATGAATAATGACAATTTTCAGATATCTACATAGCAGGTTGCAG          | 2400 |
| PX245442  | ACCTCAAATGTAGATGTCATGAATAATGACAATTTTCAGATATCTACATAGCAGGTTGCAG<br>***** | 2400 |

|           |                                                                        |      |
|-----------|------------------------------------------------------------------------|------|
| HQ625439  | GCCTTTGAGTTTCATAAGCCTATGCCTTTAACAGCTAACGGGCAGCCAGTATATCCCCCTT          | 2460 |
| NC_014326 | GCCTTTGAGTTTCATAAGCCTATGCCTTTAACAGCTAATGGGCAGCCAGTATATCCCCCTT          | 2460 |
| PX123224  | GCCTTTGAGTTTCATAAGCCTATGCCTTTAACAGCTAATGGGCAGCCAGTATATCCCCCTT          | 2460 |
| PX245442  | GCCTTTGAGTTTCATAAGCCTATGCCTTTAACAGCTAATGGGCAGCCAGTATATCCCCCTT<br>***** | 2460 |
| HQ625439  | ACTAAAGCTAATTGGAATCTTTTTTTACAAGGCTGGCTAATCAATTAGGAATCGAAGAG            | 2520 |
| NC_014326 | ACTAAAGCTAATTGGAATCTTTTTTTACAAGGCTGGCTAATCAATTAGGAATCGAAGAG            | 2520 |
| PX123224  | ACTAAAGCTAATTGGAATCTTTTTTTACAAGGCTGGCTAATCAATTAGGAATCGAAGAG            | 2520 |
| PX245442  | ACTAAAGCTAATTGGAATCTTTTTTTACAAGGCTGGCTAATCAATTAGGAATCGAAGAG<br>*****   | 2520 |
| HQ625439  | GAGGAGGGCGAGAATGAACAGCCTGGAACACGTTTCGATGCAGTGCAGACCAGATACT             | 2580 |
| NC_014326 | GAGGAGGGCGAGAATGAACAGCCTGGAACACGTTTCGATGCAGTGCAGACCAGATACT             | 2580 |
| PX123224  | GAGGAGGGCGAGAATGAACAGCCTGGAACACGTTTCGATGCAGTGCAGACCAGATACT             | 2580 |
| PX245442  | GAGGAGGGCGAGAATGAACAGCCTGGAACACGTTTCGATGCAGTGCAGACCAGATACT<br>*****    | 2580 |
| HQ625439  | GAACCTTTACGAGAAAGGCAGTAAATGTTTAGCGGACCACATACTATATTGGGAGCTTGT           | 2640 |
| NC_014326 | GAACCTTTACGAGAAAGGCAGTAAATGTTTAGCGGACCACATACTATATTGGGAGCTTGT           | 2640 |
| PX123224  | GAACCTTTACGAGAAAGGCAGTAAATGTTTAGCGGACCACATACTATATTGGGAGCTTGT           | 2640 |
| PX245442  | GAACCTTTACGAGAAAGGCAGTAAATGTTTAGCGGACCACATACTATATTGGGAGCTTGT<br>*****  | 2640 |
| HQ625439  | TAGGAAAGAAGGAGCATTGCAATTCTGTGCTCGTAGAGGGGGACTCAACAAGCTCGGACT           | 2700 |
| NC_014326 | TAGGAAAGAAGGAGCATTGCAATTCTGTGCTCGTAGAGGGGGACTCAACAAGCTCGGACT           | 2700 |
| PX123224  | TAGGAAAGAAGGAGCATTGCAATTCTGTGCTCGTAGAGGGGGACTCAACAAGCTCGGACT           | 2700 |
| PX245442  | TAGGAAAGAAGGAGCATTGCAATTCTGTGCTCGTAGAGGGGGACTCAACAAGCTCGGACT<br>*****  | 2700 |
| HQ625439  | GCAACCCCTACCCAGCACCATAGGAGCCGAGAACAAGGCCAAAAGGGCAATTGAGATGCA           | 2760 |
| NC_014326 | GCAACCCCTACCCAGCACCATAGGAGCTGAGAACAAGGCCAAAAGGGCAATTGAGATGCA           | 2760 |
| PX123224  | GCAACCCCTACCCAGCACCATAGGAGCTGAGAACAAGGCCAAAAGGGCAATTGAGATGCA           | 2760 |
| PX245442  | GCAACCCCTACCCAGCACCATAGGAGCTGAGAACAAGGCCAAAAGGGCAATTGAGATGCA<br>*****  | 2760 |
| HQ625439  | ATTGGTGCTAACATCTCTCAATGAATCACCCCTTGGTCCGAGGAGTGGACAATGGCTGA            | 2820 |
| NC_014326 | ATTGGTGCTAACATCTCTCAATGAATCACCCCTTGGTCCGAGGAGTGGACAATGGCTGA            | 2820 |
| PX123224  | ATTGGTGCTAACATCTCTCAATGAATCACCCCTTGGTCCGAGGAGTGGACAATGGCTGA            | 2820 |
| PX245442  | ATTGGTGCTAACATCTCTCAATGAATCACCCCTTGGTCCGAGGAGTGGACAATGGCTGA<br>*****   | 2820 |
| HQ625439  | AACTAGCCGTGAGATGTATGACAGCACTGAGCCGTATGGGACTTTTAAAAAAGCGGCGA            | 2880 |
| NC_014326 | AACTAGCCGTGAGATGTATGACAGCACTGAGCCGTATGGGACTTTTAAAAAAGTGGCGA            | 2880 |
| PX123224  | AACTAGCCGTGAGATGTATGACAGCACTGAGCCGTATGGGACTTTTAAAAAAGTGGCGA            | 2880 |
| PX245442  | AACTAGCCGTGAGATGTATGACAGCACTGAGCCGTATGGGACTTTTAAAAAAGTGGCGA<br>*****   | 2880 |
| HQ625439  | GGAGGTGGAAGTCTATTATGGAGGAGATGAAGATAATAATGTGTCTTATATGCTCTGGAA           | 2940 |
| NC_014326 | GGAGGTGGAAGTCTATTATGGAGGAGATGAAGATAATAATGTGTCTTATATGCTCTGGAA           | 2940 |
| PX123224  | GGAGGTGGAAGTCTATTATGGAGGAGATGAAGATAATAATGTGTCTTATATGCTCTGGAA           | 2940 |
| PX245442  | GGAGGTGGAAGTCTATTATGGAGGAGATGAAGATAATAATGTGTCTTATATGCTCTGGAA<br>*****  | 2940 |
| HQ625439  | GTATGTCTATGCCAGGATGAGAACGGCAACTGGCATAAGTATCAGAGCGATTGTGACTA            | 3000 |
| NC_014326 | GTATGTCTATGCCAGGATGAGAACGGCAACTGGCATAAGTATCAGAGCGATTGTGACTA            | 3000 |
| PX123224  | GTATGTCTATGCCAGGATGAGAACGGCAACTGGCATAAGTATCAGAGCGATTGTGACTA            | 3000 |
| PX245442  | GTATGTCTATGCCAGGATGAGAACGGCAACTGGCATAAGTATCAGAGCGATTGTGACTA<br>*****   | 3000 |

|           |                                                                                  |      |
|-----------|----------------------------------------------------------------------------------|------|
| HQ625439  | TTATGGTGTACATTAACTGACCACAGTGGGACCCGTATCTATTATCATGATTTTGACAG                      | 3060 |
| NC_014326 | TTATGGTGTACATTAACTGACCACAGTGGGACCCGTATCTATTATCATGATTTTGACAG                      | 3060 |
| PX123224  | TTATGGTGTACATTAACTGACCACAGTGGGACCCGTATCTATTATCATGATTTTGACAG                      | 3060 |
| PX245442  | TTATGGTGTACATTAACTGACCACAGTGGGACCCGTATCTATTATCATGATTTTGACAG<br>*****             | 3060 |
| HQ625439  | TGATTCTCGCAGATATGGGGATTATTCTCACTGGACTGTGAATTATAAACACAAAACCTTT                    | 3120 |
| NC_014326 | TGATTCTCGCAGATATGGGGATTATTCTCACTGGACTGTGAATTATAAACACAAAACCTTT                    | 3120 |
| PX123224  | TGATTCTCGCAGATATGGGGATTATTCTCACTGGACTGTGAATTATAAACACAAAACCTTT                    | 3120 |
| PX245442  | TGATTCTCGCAGATATGGGGATTATTCTCACTGGACTGTGAATTATAAACACAAAACCTTT<br>*****           | 3120 |
| HQ625439  | TGAATCTTCTCCTGATAGCTCCTCCTCAGCCAAAGAAGGGCATCAAAAAACAACAGACG                      | 3180 |
| NC_014326 | TGAATCTTCTCCTGATAGCTCCTCCTCAGCCAAAGAAGGGCATCAAAAAACAACAGACG                      | 3180 |
| PX123224  | TGAATCTTCTCCTGATAGCTCCTCCTCAGCCAAAGAAGGGCATCAAAAAACAACAGACG                      | 3180 |
| PX245442  | TGAATCTTCTCCTGATAGCTCCTCCTCAGCCAAAGAAGGGCATCAAAAAACAACAGACG<br>*****             | 3180 |
| HQ625439  | GCCCGAAGACAACACCGCCACGAAGAGAAGCTCTTCCACCGACACCACTGACACAGCCGC                     | 3240 |
| NC_014326 | GCCCGAAGACAACACCGCCACGAAGAGAAGCTCTTCCACCGACACCACTGACACAGCCGC                     | 3240 |
| PX123224  | GCCCGAAGACAACACCGCCACGAAGAGAAGCTCTTCCACCGACACCACTGACACAGCCGC                     | 3240 |
| PX245442  | GCCCGAAGACAACACCGCCACGAAGAGAAGCTCTTCCACCGACACCACTGACACAGCCGC<br>*****            | 3240 |
| HQ625439  | CCCAGCCGGAGACACCATTGTTGGGGACGAGGCGGAGGATACGGACGACTCGGACAAGGAGA                   | 3300 |
| NC_014326 | CCCAGCCGGAGACACCATTGTTGGGGACGAGGCGGAGGAGGA---GTACGACTCGGACAAGGAGA                | 3297 |
| PX123224  | CCCAGCCGGAGACACCATTGTTGGGGACGAGGCGGAGGAGGA---GTACGACTCGGACAAGGAGA                | 3297 |
| PX245442  | CCCAGCCGGAGACACCATTGTTGGGGACGAGGCGGAGGAGGA---GTACGACTCGGACAAGGAGA<br>*** ***** * | 3297 |
| HQ625439  | ACGACAAACCTGCATCCGGAAGCTTGGTCAAGCGCTGCAGAGACTCCAGCGGGACCTGA                      | 3360 |
| NC_014326 | ACGACAAACCTGCATCCGGAAGCTTGGTCAAGCGCTGCAGAGACTCCAGCAGGACCTGA                      | 3357 |
| PX123224  | ACGACAAACCTGCATCCGGAAGCTTGGTCAAGCGCTGCAGAGACTCCAGCAGGACCTGA                      | 3357 |
| PX245442  | ACGACAAACCTGCATCCGGAAGCTTGGTCAAGCGCTGCAGAGACTCCAGCAGGACCTGA<br>*****             | 3357 |
| HQ625439  | AGGATCTGCAGGACCTTGTCAACCAAACAGCATCCGGCATCACCATACTCATAGGCCAAT                     | 3420 |
| NC_014326 | GGGATCTGCAGGACCTTGTCAACCAAACAGCCGGCATCACCATACTCATAGGCCAAT                        | 3417 |
| PX123224  | GGGATCTGCAGGACCTTGTCAACCAAACAGCCGGCATCACCATACTCATAGGCCAAT                        | 3417 |
| PX245442  | GGGATCTGCAGGACCTTGTCAACCAAACAGCCGGCATCACCATACTCATAGGCCAAT<br>*****               | 3417 |
| HQ625439  | AATCTCTGTCAAAGGTCCGACTAACTCTTTAAATGCTGGCGGAATAGGTTGCGTCGGAG                      | 3480 |
| NC_014326 | AATCTCTGTCAAAGGTCCGACTAACTCTTTAAATGCTGGCGGAATAGGTTGCGTCGGAG                      | 3477 |
| PX123224  | AATCTCTGTCAAAGGTCCGACTAACTCTTTAAATGCTGGCGGAATAGGTTGCGTCGGAG                      | 3477 |
| PX245442  | AATCTCTGTCAAAGGTCCGACTAACTCTTTAAATGCTGGCGGAATAGGTTGCGTCGGAG<br>*****             | 3477 |
| HQ625439  | AACATATAAGCCATATAGCCGTGTATCTACTGCCTTTCAGTGGGTTGAGGATAGGGCGGA                     | 3540 |
| NC_014326 | AACATATAAGCCATATAGCCGTGTATCTACTGCCTTTCAGTGGGTTGAGGACAGGGCGGA                     | 3537 |
| PX123224  | AACATATAAGCCATATAGCCGTGTATCTACTGCCTTTCAGTGGGTTGAGGACAGGGCGGA                     | 3537 |
| PX245442  | AACATATAAGCCATATAGCCGTGTATCTACTGCCTTTCAGTGGGTTGAGGACAGGGCGGA<br>*****            | 3537 |
| HQ625439  | CGGGGTAGAGGTGGGGGATAGGTGGCAGGTTAGCTTTAGCAATGTACTGTAGCTTTTGC                      | 3600 |
| NC_014326 | CGGGGTAGAGGTGGGGGATAGGTGGCAGGTTAGCTTTAGCAATGTACTGTAGCTTTTGC                      | 3597 |
| PX123224  | CGGGGTAGAGGTGGGGGATAGGTGGCAGGTTAGCTTTAGCAATGTACTGTAGCTTTTGC                      | 3597 |
| PX245442  | CGGGGTAGAGGTGGGGGATAGGTGGCAGGTTAGCTTTAGCAATGTACTGTAGCTTTTGC<br>*****             | 3597 |

|           |                                                                            |      |
|-----------|----------------------------------------------------------------------------|------|
| HQ625439  | AGACACGCATCAAAAAGAAGTGTTTCTAAAGACTGTGACACTGCCCAAGGGCTGCTCATA               | 3660 |
| NC_014326 | AGACACGTATCAAAAAGAAGTGTTTCTAAAGACTGTGACACTGCCCAAGGGCTGCTCATA               | 3657 |
| PX123224  | AGACACGTATCAAAAAGAAGTGTTTCTAAAGACTGTGACACTGCCCAAGGGCTGCTCATA               | 3657 |
| PX245442  | AGACACGTATCAAAAAGAAGTGTTTCTAAAGACTGTGACACTGCCCAAGGGCTGCTCATA<br>*****      | 3657 |
| HQ625439  | CACCAGTGGCTTCTTAGACGGACTCTGATAGTGGACTCTATACACCATCCAGAATTACTG               | 3720 |
| NC_014326 | CACCAGTGGCTTCTTAGACGGACTCTGATAGTGGATTCTATACACCATCCAGAATTACTG               | 3717 |
| PX123224  | CACCAGTGGCTTCTTAGACGGACTCTGATAGTGGATTCTATACACCATCCAGAATTACTG               | 3717 |
| PX245442  | CACCAGTGGCTTCTTAGACGGACTCTGATAGTGGATTCTATACACCATCCAGAATTACTG<br>*****      | 3717 |
| HQ625439  | TACCTGTTAGATTATTTTGTACCATTATGGTGTCTGCTGACAGAAGCAGGCGCGTCAAG                | 3780 |
| NC_014326 | TACCTGTTAGATTATTTTGTACCATTATGGTGTCTGCTGACAGAAGCAGGCGCGTCAAG                | 3777 |
| PX123224  | TACCTGTTAGATTATTTTGTACCATTATGGTGTCTGCTGACAGAAGCAGGCGCGTCAAG                | 3777 |
| PX245442  | TACCTGTTAGATTATTTTGTACCATTATGGTGTCTGCTGACAGAAGCAGGCGCGTCAAG<br>*****       | 3777 |
| HQ625439  | AGGGACTCTGCGTCAAACCTATACAGACAATGTCAAGTAACCGGGAATTGTCCACCTGAT               | 3840 |
| NC_014326 | AGGGACTCTGCGTCAAACCTATACAGACAATGTCAAGTAACCGGGAATTGTCCACCTGAT               | 3837 |
| PX123224  | AGGGACTCTGCGTCAAACCTATACAGACAATGTCAAGTAACCGGGAATTGTCCACCTGAT               | 3837 |
| PX245442  | AGGGACTCTGCGTCAAACCTATACAGACAATGTCAAGTAACCGGGAATTGTCCACCTGAT<br>*****      | 3837 |
| HQ625439  | GTAGTCAATAAAGTCGAAGGAAACACACTTGCTGACAGGATTCTTAAAGTTATTAGTAGC               | 3900 |
| NC_014326 | GTAGTCAATAAAGTCGAAGGAAACACACTTGCTGACAGGATTCTTAAAGTTATTAGTAGC               | 3897 |
| PX123224  | GTAGTCAATAAAGTCGAAGGAAACACACTTGCTGACAGGATTCTTAAAGTTATTAGTAGC               | 3897 |
| PX245442  | GTAGTCAATAAAGTCGAAGGAAACACACTTGCTGACAGGATTCTTAAAGTTATTAGTAGC<br>*****      | 3897 |
| HQ625439  | ATTGTATACTTGGGGGGGCTTGGCATTGGAAGTGCGAGAGGCTCCGGGGGCACCACTGGC               | 3960 |
| NC_014326 | ATTGTATACTTGGGGGGGCTTGGCATTGGAAGTGCGAGAGGCTCCGGGGGCACCACTGGC               | 3957 |
| PX123224  | ATTGTATACTTGGGGGGGCTTGGCATTGGAAGTGCGAGAGGCTCCGGGGGCACCACTGGC               | 3957 |
| PX245442  | ATTGTATACTTGGGGGGGCTTGGCATTGGAAGTGCGAGAGGCTCCGGGGGCACCACTGGC<br>*****      | 3957 |
| HQ625439  | TATGGGCCATAAACTCTGCTGGTGGAAGGGTAACAGGCACAGGCACGGTCATGAGGCCT                | 4020 |
| NC_014326 | TATGGGCCATAAACTCTGCTGGTGGAAGGGTAACAGGCACAGGCACGGTCATGAGGCCT                | 4017 |
| PX123224  | TATGGGCCATAAACTCTGCTGGTGGAAGGGTAACAGGCACAGGCACGGTCATGAGGCCT                | 4017 |
| PX245442  | TATGGGCCATAAACTCTGCTGGTGGAAGGGTAACAGGCACAGGCACGGTCATGAGGCCT<br>*****       | 4017 |
| HQ625439  | GGTGTCACTGTTGAGCCCATTGGCCCAGGGGACATAGTCACTGTAGACTCCGTGGGACCT               | 4080 |
| NC_014326 | GGTGTCACTGTTGAGCCCATTGGCCCAGGGGACATAGTCACTGTAGACTCTGTGGGCCCT               | 4077 |
| PX123224  | GGTGTCACTGTTGAGCCCATTGGCCCAGGGGACATAGTCACTGTAGACTCTGTGGGCCCT               | 4077 |
| PX245442  | GGTGTCACTGTTGAGCCCATTGGCCCAGGGGACATAGTCACTGTAGACTCTGTGGGCCCT<br>*****      | 4077 |
| HQ625439  | GGGGAATTCGAGCCTTATTCCTCTACTTGAGGTGACCCCCGATGTCCCATATAAATGGGGGA             | 4140 |
| NC_014326 | GGGGAATTCGAGCCTTATTCCTCTACTTGAGGTGACCCCCGATGTCCCATATAAATGGGGGA             | 4137 |
| PX123224  | GGGGAATTCGAGCCTTATTCCTCTACTTGAGGTGACCCCCGATGTCCCATATAAATGGGGGA             | 4137 |
| PX245442  | GGGGAATTCGAGCCTTATTCCTCTACTTGAGGTGACCCCCGATGTCCCATATAAATGGGGGA<br>** ***** | 4137 |
| HQ625439  | CCCAGGTTCTTCTAGTGGTCCAGACATAAGCACAGTGGACGTGACTCTAGCATAGAC                  | 4200 |
| NC_014326 | CCCAGGTTCTTCTAGTGGGCCAGACATAAGCACAGTGGACGTGACATCTAGCATAGAC                 | 4197 |
| PX123224  | CCCAGGTTCTTCTAGTGGGCCAGACATAAGCACAGTGGACGTGACATCTAGCATAGAC                 | 4197 |
| PX245442  | CCCAGGTTCTTCTAGTGGGCCAGACATAAGCACAGTGGACGTGACATCTAGCATAGAC<br>*****        | 4197 |

|           |                                                               |      |
|-----------|---------------------------------------------------------------|------|
| HQ625439  | CCAATATCTGACCTGTCTGTGACTGGCACCACAATCTCCAACACAGACTCTGCTGTCATT  | 4260 |
| NC_014326 | CCAATATCAGACCTGTCTGTGACTGGCACCACAATCTCCAACACAGACTCTGCTGTCATT  | 4257 |
| PX123224  | CCAATATCAGACCTGTCTGTGACTGGCACCACAATCTCCAACACAGACTCTGCTGTCATT  | 4257 |
| PX245442  | CCAATATCAGACCTGTCTGTGACTGGCACCACAATCTCCAACACAGACTCTGCTGTCATT  | 4257 |
|           | *****                                                         |      |
| HQ625439  | GATGTTACGCCCTCCCCGGGTCCTCGTAGAGTCATAATCACTAGAAGTGACTTTAATAAC  | 4320 |
| NC_014326 | GATGTTACGCCATCCCCGGGCCCTCGTAGAGTCATAATCACTAGAAGTGACTTTAATAAC  | 4317 |
| PX123224  | GATGTTACGCCATCCCCGGGCCCTCGTAGAGTCATAATCACTAGAAGTGACTTTAATAAC  | 4317 |
| PX245442  | GATGTTACGCCATCCCCGGGCCCTCGTAGAGTCATAATCACTAGAAGTGACTTTAATAAC  | 4317 |
|           | *****                                                         |      |
| HQ625439  | CCCTCCTACGTGTCTGTGTGTCACCCACACAGGGGTTGGGGGAGTCTGGGGGTGTCATT   | 4380 |
| NC_014326 | CCCTCCTATGTGTCTGTGTGTCACCCACACAGGGGTTGGGGGAGTCTGGGGGTGTCATT   | 4377 |
| PX123224  | CCCTCCTATGTGTCTGTGTGTCACCCACACAGGGGTTGGGGGAGTCTGGGGGTGTCATT   | 4377 |
| PX245442  | CCCTCCTATGTGTCTGTGTGTCACCCACACAGGGGTTGGGGGAGTCTGGGGGTGTCATT   | 4377 |
|           | *****                                                         |      |
| HQ625439  | AGTGGAGAAAGTGGAGGCATAATATCCAGCATAACATGAGCTGGATAACACCACAGTCATA | 4440 |
| NC_014326 | AGTGGAGAAAGTGGAGGCATAATATCCAGCATAACATGAGCTGGATAACACCACAGTCATA | 4437 |
| PX123224  | AGTGGAGAAAGTGGAGGCATAATATCCAGCATAACATGAGCTGGATAACACCACAGTCATA | 4437 |
| PX245442  | AGTGGAGAAAGTGGAGGCATAATATCCAGCATAACATGAGCTGGATAACACCACAGTCATA | 4437 |
|           | *****                                                         |      |
| HQ625439  | GGTGCTAGGCCACCACCTGAGAGGATACTGGATGAGGTACCAGGACCCCTTTGAGGACATT | 4500 |
| NC_014326 | GGTGCTAGGCCACCACCTGAAAGGATATTGGATGAGGTACCAGGACCCCTTTGAGGACATT | 4497 |
| PX123224  | GGTGCTAGGCCACCACCTGAAAGGATATTGGATGAGGTACCAGGACCCCTTTGAGGACATT | 4497 |
| PX245442  | GGTGCTAGGCCACCACCTGAAAGGATATTGGATGAGGTACCAGGACCCCTTTGAGGACATT | 4497 |
|           | *****                                                         |      |
| HQ625439  | GAGCTTGACACATTTGTTGAGTCTAGTGGTCTTAGTGAGTTTGACATAGAGCAGCCCCCTC | 4560 |
| NC_014326 | GTGCTTGACACATTTGTTGAGTCTAGTGGTCTTAGTGAGTTTGACATAGAGCAGCCCCCTC | 4557 |
| PX123224  | GTGCTTGACACATTTGTTGAGTCTAGTGGTCTTAGTGAGTTTGACATAGAGCAGCCCCCTC | 4557 |
| PX245442  | GAGCTTGACACATTTGTTGAGTCTAGTGGTCTTAGTGAGTTTGACATAGAGCAGCCCCCTC | 4557 |
|           | * *****                                                       |      |
| HQ625439  | ACTAGCACACCTGAAGGCCCGTTGCAAAGGGCGGCCACTAGATTTCAGAGACCTGTATAAT | 4620 |
| NC_014326 | ACTAGCACACCTGAAGGCCCGTTGCAAAGGGCGGCCACTAGATTTCAGAGACCTGTATAAT | 4617 |
| PX123224  | ACTAGCACACCTGAAGGCCCGTTGCAAAGGGCGGCCACTAGATTTCAGAGACCTGTATAAT | 4617 |
| PX245442  | ACTAGCACACCTGAAGGCCCGTTGCAAAGGGCGGCCACTAGATTTCAGAGACCTGTATAAT | 4617 |
|           | *****                                                         |      |
| HQ625439  | AGGCGGGTGCAGCAGGTGCGTGTATCCAATCCAGAAGCTTTTCTAACTGGTCCCAGACAG  | 4680 |
| NC_014326 | AGGCGGGTGCAGCAGGTGCGTGTATCCAATCCAGAAGCTTTTCTAACTGGTCCCAGACAG  | 4677 |
| PX123224  | AGGCGGGTGCAGCAGGTGCGTGTATCCAATCCAGAAGCTTTTCTAACTGGTCCCAGACAG  | 4677 |
| PX245442  | AGGCGGGTGCAGCAGGTGCGTGTATCCAATCCAGAAGCTTTTCTAACTGGTCCCAGACAG  | 4677 |
|           | *****                                                         |      |
| HQ625439  | GCGGTAGTATTTGAAAATCCCGCCTTTGAGCCTGGGAGCCTGGATTTTGAACCTCCCGCC  | 4740 |
| NC_014326 | GCGGTAGTATTTGAAAATCCCGCCTTTGAGCCTGGGAGCCTGGATTTTGAACCTCCCGCC  | 4737 |
| PX123224  | GCGGTAGTATTTGAAAATCCCGCCTTTGAGCCTGGGAGCCTGGATTTTGAACCTCCCGCC  | 4737 |
| PX245442  | GCGGTAGTATTTGAAAATCCCGCCTTTGAGCCTGGGAGCCTGGATTTTGAACCTCCCGCC  | 4737 |
|           | *****                                                         |      |
| HQ625439  | GGTCCTCCTGTAGCTGCACCTGACCCTGAGTACACTGATGTGGTCCACCTAGGGCGTCAG  | 4800 |
| NC_014326 | AGTCCTCCTGTAGCTGCACCTGACCCTGAGTACACTGATGTGGTCCACCTAGGGCGTCAG  | 4797 |
| PX123224  | AGTCCTCCTGTAGCTGCACCTGACCCTGAGTACACTGATGTGGTCCACCTAGGGCGTCAG  | 4797 |
| PX245442  | AGTCCTCCTGTAGCTGCACCTGACCCTGAGTACACTGATGTGGTCCACCTAGGGCGTCAG  | 4797 |
|           | *****                                                         |      |



|           |                                                                        |      |
|-----------|------------------------------------------------------------------------|------|
| HQ625439  | AGGTTCTCTGAGGTGAACAGAGTAATTAGAGTGAGCAGGTTGGGGCAACGTGCATCCATG           | 4860 |
| NC_014326 | AGGTTCTCTGAGGTGAACAGAGTAATTAGAGTGAGCAGGTTGGGGCAACGTGCATCTATG           | 4857 |
| PX123224  | AGGTTCTCTGAGGTGAACAGAGTAATTAGAGTGAGCAGGTTGGGGCAACGTGCATCTATG           | 4857 |
| PX245442  | AGGTTCTCTGAGGTGAACAGAGTAATTAGAGTGAGCAGGTTGGGGCAACGTGCATCTATG<br>*****  | 4857 |
| HQ625439  | AAGACTAGGAGTGGTCTTATAATTGGTGGGAAAGTGCACTTCTATACAGATTTATCCCT            | 4920 |
| NC_014326 | AAGACTAGGAGTGGTCTTATAATTGGTGGGAAAGTGCACTTCTATACAGATTTATCCCT            | 4917 |
| PX123224  | AAGACTAGGAGTGGTCTTATAATTGGTGGGAAAGTGCACTTCTATACAGATTTATCCCT            | 4917 |
| PX245442  | AAGACTAGGAGTGGTCTTATAATTGGTGGGAAAGTGCACTTCTATACAGATTTATCCCT<br>*****   | 4917 |
| HQ625439  | GTTGCTACGGACATTGAAATGCACACATTAGGTGAGATCAGTGGTACTGAAGAGCTGATT           | 4980 |
| NC_014326 | GTTGCTACGGACATTGAAATGCACACATTAGGTGAGATCAGTGGTACTGAAGAGCTGATT           | 4977 |
| PX123224  | GTTGCTACGGACATTGAAATGCACACATTAGGTGAGATCAGTGGTACTGAAGAGCTGATT           | 4977 |
| PX245442  | GTTGCTACGGACATTGAAATGCACACATTAGGTGAGATCAGTGGTACTGAAGAGCTGATT<br>*****  | 4977 |
| HQ625439  | GATGGTCTTGGGAAGCTCTTCAGTAATTGAGTTCCCAAGGGGGGTTGAGTCTGTAGAGCTT          | 5040 |
| NC_014326 | GATGGTCTTGGGAAGCTCTTCAGTAATTGAGTTCCCAAGGGGGGTTGAGTCTGTAGAGCTT          | 5037 |
| PX123224  | GATGGTCTTGGGAAGCTCTTCAGTAATTGAGTTCCCAAGGGGGGTTGAGTCTGTAGAGCTT          | 5037 |
| PX245442  | GATGGTCTTGGGAAGCTCTTCAGTAATTGAGTTCCCAAGGGGGGTTGAGTCTGTAGAGCTT<br>***** | 5037 |
| HQ625439  | CCAGATGGCTCTGACTCAGTGAATGAGCTACTTGACACCGATAGTGCTGATTTTCTTCC            | 5100 |
| NC_014326 | CCAGATGGCTCTGACTCAGTGAATGAGCTACTTGACACCGATAGTGCTGATTTTCTTCC            | 5097 |
| PX123224  | CCAGATGGCTCTGACTCAGTGAATGAGCTACTTGACACCGATAGTGCTGATTTTCTTCC            | 5097 |
| PX245442  | CCAGATGGCTCTGACTCAGTGAATGAGCTACTTGACACCGATAGTGCTGATTTTCTTCC<br>*****   | 5097 |
| HQ625439  | TCTAGGCTTGAACACTTATAGGTAATGGGACAAGCCGTTTTGTGATGCCTGACTTGGTC            | 5160 |
| NC_014326 | TCTAGGCTTGAACACTTATAGGTAATGGGACAAGCCGTTTTGTGATGCCTGACTTGGTC            | 5157 |
| PX123224  | TCTAGGCTTGAACACTTATAGGTAATGGGACAAGCCGTTTTGTGATGCCTGACTTGGTC            | 5157 |
| PX245442  | TCTAGGCTTGAACACTTATAGGTAATGGGACAAGCCGTTTTGTGATGCCTGACTTGGTC<br>*****   | 5157 |
| HQ625439  | GAAACTCTAGGCCAGACATGTTTTTCCCAGTATCGACTCAGGCACGGTTATACACCAC             | 5220 |
| NC_014326 | GAAACTCTAGGCCAGACATGTTTTTCCCAGTATCGACTCAGGCACGGTTATACACCAC             | 5217 |
| PX123224  | GAAACTCTAGGCCAGACATGTTTTTCCCAGTATCGACTCAGGCACGGTTATACACCAC             | 5217 |
| PX245442  | GAAACTCTAGGCCAGACATGTTTTTCCCAGTATCGACTCAGGCACGGTTATACACCAC<br>*****    | 5217 |
| HQ625439  | CCTCAGGATAATTATGTTCCCTATTATTCTGCCAGCTGCGGATCTATTCCCAGCTTCTACG          | 5280 |
| NC_014326 | CCTCAAGATAATTATGTTCCCTATTATTCTGCCAGCTGCGGATCTATTCCCAGCTTCTACT          | 5277 |
| PX123224  | CCTCAAGATAATTATGTTCCCTATTATTCTGCCAGCTGCGGATCTATTCCCAGCTTCTACT          | 5277 |
| PX245442  | CCTCAAGATAATTATGTTCCCTATTATTCTGCCAGCTGCGGATCTATTCCCAGCTTCTACT<br>***** | 5277 |
| HQ625439  | GTTATAAGTGTGGATGATGACTTTGCTGATTTTTATTGACCCCAGTCTCCGTAAACGT             | 5340 |
| NC_014326 | GTTATAAGTGTGGATGATGACTTTGCTGATTTTTATTGACCCCAGTCTCCGTAAACGC             | 5337 |
| PX123224  | GTTATAAGTGTGGATGATGACTTTGCTGATTTTTATTGACCCCAGTCTCCGTAAACGC             | 5337 |
| PX245442  | GTTATAAGTGTGGATGATGACTTTGCTGATTTTTATTGACCCCAGTCTCCGTAAACGC<br>*****    | 5337 |
| HQ625439  | AAACGAAAATATCGTATTTATTGATATTTTTTCAGATGGCAATGTGGACACCCAGACCGG           | 5400 |
| NC_014326 | AAACGAAAATATCGTATTTATTGATATTTTTTCAGATGGCAATGTGGACACCCAGACCGG           | 5397 |
| PX123224  | AAACGAAAATATCGTATTTATTGATATTTTTTCAGATGGCAATGTGGACACCCAGACCGG           | 5397 |
| PX245442  | AAACGAAAATATCGTATTTATTGATATTTTTTCAGATGGCAATGTGGACACCCAGACCGG<br>*****  | 5397 |

|           |                                                                            |      |
|-----------|----------------------------------------------------------------------------|------|
| HQ625439  | GAAGCTTTACCCCCACCTACAACCTCCAGTGGCAAAAGTGCAGAGCACAGACGAATATGT               | 5460 |
| NC_014326 | GAAGCTTTACCTCCCACCTACAACCTCCAGTGGCAAAAGTGCAGAGCACAGACGAATATGT              | 5457 |
| PX123224  | GAAGCTTTACCTCCCACCTACAACCTCCAGTGGCAAAAGTGCAGAGCACAGACGAATATGT              | 5457 |
| PX245442  | GAAGCTTTACCTCCCACCTACAACCTCCAGTGGCAAAAGTGCAGAGCACAGACGAATATGT<br>*****     | 5457 |
| HQ625439  | GTACCCTACGTCTCTCTCTGTGCATGCACACACGGACCGTTTGCTAACAGTGGGCCACCC               | 5520 |
| NC_014326 | GTACCCTACGTCTCTCTCTGTGCATGCACACACGGACCGTTTGCTAACAGTGGGCCACCC               | 5517 |
| PX123224  | GTACCCTACGTCTCTCTCTGTGCATGCACACACGGACCGTTTGCTAACAGTGGGCCACCC               | 5517 |
| PX245442  | GTACCCTACGTCTCTCTCTGTGCATGCACACACGGACCGTTTGCTAACAGTGGGCCACCC<br>*****      | 5517 |
| HQ625439  | GTATTTTTCTGTCTTGACAATGACAAGGTCACTGTGCCTAAAGTGTCTGGCAACCAATA                | 5580 |
| NC_014326 | TTTTTTTTCTGTCTTGACAATGACAAGGTCACTGTGCCTAAAGTGTCTGGCAACCAATA                | 5577 |
| PX123224  | TTTTTTTTCTGTCTTGACAATGACAAGGTCACTGTGCCTAAAGTGTCTGGCAACCAATA                | 5577 |
| PX245442  | TTTTTTTTCTGTCTTGACAATGACAAGGTCACTGTGCCTAAAGTGTCTGGCAACCAATA<br>* *****     | 5577 |
| HQ625439  | TAGAGTTTTTCAGACTTAAATTTCCAGATCCAAATAAATTTGCATTGCCCCAAAAGGATTT              | 5640 |
| NC_014326 | TAGGGTTTTTCAGACTTAAATTTCCAGATCCAAATAAATTTGCATTGCCCCAAAAGGATTT              | 5637 |
| PX123224  | TAGGGTTTTTCAGACTTAAATTTCCAGATCCAAATAAATTTGCATTGCCCCAAAAGGATTT              | 5637 |
| PX245442  | TAGGGTTTTTCAGACTTAAATTTCCAGATCCAAATAAATTTGCATTGCCCCAAAAGGATTT<br>*** ***** | 5637 |
| HQ625439  | CTATGATCCTGAGAAAGAACGGTTAGTGTGGAGGTTAAGGGGTCTGGAAATTGGAAGAGG               | 5700 |
| NC_014326 | CTATGATCCTGAGAAAGAACGGTTAGTGTGGAGGTTAAGGGGTCTGGAAATTGGAAGAGG               | 5697 |
| PX123224  | CTATGATCCTGAGAAAGAACGGTTAGTGTGGAGGTTAAGGGGTCTGGAAATTGGAAGAGG               | 5697 |
| PX245442  | CTATGATCCTGAGAAAGAACGGTTAGTGTGGAGGTTAAGGGGTCTGGAAATTGGAAGAGG<br>*****      | 5697 |
| HQ625439  | TGGCCCATTAGGGATTGGCACTACCGGGCACCCCTTTTAAACAAGCTTGAGACACGGA                 | 5760 |
| NC_014326 | TGGCCCATTAGGGATTGGCACTACCGGGCACCCCTTTTAAACAAGCTTGAGACACGGA                 | 5757 |
| PX123224  | TGGCCCATTAGGGATTGGCACTACCGGGCACCCCTTTTAAACAAGCTTGAGACACGGA                 | 5757 |
| PX245442  | TGGCCCATTAGGGATTGGCACTACCGGGCACCCCTTTTAAACAAGCTTGAGACACGGA<br>*****        | 5757 |
| HQ625439  | AAATCCAAACAAATATCAGCAAGGCTCTAAGGATAATAGGCAGAACACTTCCATGGACCC               | 5820 |
| NC_014326 | AAATCCAAATAAATATCAGCAAGGCTCTAAGGATAATAGGCAGAACACTTCCATGGACCC               | 5817 |
| PX123224  | AAATCCAAATAAATATCAGCAAGGCTCTAAGGATAATAGGCAGAACACTTCCATGGACCC               | 5817 |
| PX245442  | AAATCCAAATAAATATCAGCAAGGCTCTAAGGATAATAGGCAGAACACTTCCATGGACCC<br>*****      | 5817 |
| HQ625439  | CAAACAAACACAGCTGTTTATTGTTGGATGTGAACCCCTACAGGGGAACACTGGGATGT                | 5880 |
| NC_014326 | CAAACAAACACAGCTGTTTATTGTTGGCTGTGAACCCCTACAGGGGAACACTGGGATGT                | 5877 |
| PX123224  | CAAACAAACACAGCTGTTTATTGTTGGCTGTGAACCCCTACAGGGGAACACTGGGATGT                | 5877 |
| PX245442  | CAAACAAACACAGCTGTTTATTGTTGGCTGTGAACCCCTACAGGGGAACACTGGGATGT<br>*****       | 5877 |
| HQ625439  | AGCTAAGCCCTGTGGAGCTCTGGAAGGGTGACTGCCCTCCTATCCAACCTGTAAATAG                 | 5940 |
| NC_014326 | AGCTAAGCCCTGTGGAGCTCTGGAGAAGGGTGACTGCCCTCCTATCCAACCTGTAAATAG               | 5937 |
| PX123224  | AGCTAAGCCCTGTGGAGCTCTGGAGAAGGGTGACTGCCCTCCTATCCAACCTGTAAATAG               | 5937 |
| PX245442  | AGCTAAGCCCTGTGGAGCTCTGGAGAAGGGTGACTGCCCTCCTATCCAACCTGTAAATAG<br>*****      | 5937 |
| HQ625439  | TGTAATCGAGGATGGGGATATGTGTGACATTGGCTTTGGGAATATGAACCTCAAAGAGCT               | 6000 |
| NC_014326 | TGTAATTGAGGATGGGGATATGTGTGACATTGGCTTTGGGAATATGAACCTCAAAGAGCT               | 5997 |
| PX123224  | TGTAATTGAGGATGGGGATATGTGTGACATTGGCTTTGGGAATATGAACCTCAAAGAGCT               | 5997 |
| PX245442  | TGTAATTGAGGATGGGGATATGTGTGACATTGGCTTTGGGAATATGAACCTCAAAGAGCT<br>*****      | 5997 |

|           |                                                                               |      |
|-----------|-------------------------------------------------------------------------------|------|
| HQ625439  | GCAGCAGGACAGGAGTGGTGTGCCTCTTGATATTGTATCTACCCGGTGCAAATGGCCCGA                  | 6060 |
| NC_014326 | GCAGCAGGATAGGAGTGGTGTGCCTCTTGATATTGTATCTACCCGGTGCAAATGGCCCGA                  | 6057 |
| PX123224  | GCAGCAGGATAGGAGTGGTGTGCCTCTTGATATTGTATCTACCCGGTGCAAATGGCCCGA                  | 6057 |
| PX245442  | GCAGCAGGATAGGAGTGGTGTGCCTCTTGATATTGTATCTACCCGGTGCAAATGGCCCGA<br>*****         | 6057 |
| HQ625439  | CTTTCTGAAAATGACCAATGAGGCATATGGGGATAAGATGTTCTTCTTTGGAAGGAGAGA                  | 6120 |
| NC_014326 | CTTTCTGAAAATGACCAATGAGGCATATGGGGATAAGATGTTCTTCTTTGGAAGGAGAGA                  | 6117 |
| PX123224  | CTTTCTGAAAATGACCAATGAGGCATATGGGGATAAGATGTTCTTCTTTGGAAGGAGAGA                  | 6117 |
| PX245442  | CTTTCTGAAAATGACCAATGAGGCATATGGGGATAAGATGTTCTTCTTTGGAAGGAGAGA<br>*****         | 6117 |
| HQ625439  | GCAAGTGTATGCAAGACACTTTTTCACCAGGAATGGCTCTGTGGGGGAGCCCATACCAA                   | 6180 |
| NC_014326 | GCAAGTGTATGCAAGACACTTTTTCACCAGGAATGGCTCTGTGGGGGAGCCCATACCAA                   | 6177 |
| PX123224  | GCAAGTGTATGCAAGACACTTTTTCACCAGGAATGGCTCTGTGGGGGAGCCCATACCAA                   | 6177 |
| PX245442  | GCAAGTGTATGCAAGACACTTTTTCACCAGGAATGGCTCTGTGGGGGAGCCCATACCAA<br>*****          | 6177 |
| HQ625439  | CTCTGTGAGTCCCAGTGACTTTTACTACGCACCTGACAGCACACAGGACCAGAAGACACT                  | 6240 |
| NC_014326 | CTCTGTGAGTCCCAGTGACTTTTACTACGCACCCGACAGCACACAGGACCAGAAGACACT                  | 6237 |
| PX123224  | CTCTGTGAGTCCCAGTGACTTTTACTACGCACCCGACAGCACACAGGACCAGAAGACACT                  | 6237 |
| PX245442  | CTCTGTGAGTCCCAGTGACTTTTACTACGCACCCGACAGCACACAGGACCAGAAGACACT<br>*****         | 6237 |
| HQ625439  | CGCTCCCTCCGTGTACTTTGGAACCTCCTAGTGGGTCTCTTGTGTCTAGTGATGGTCAGCT                 | 6300 |
| NC_014326 | CGCACCTCCTCCGTGTACTTTGGAACCTCCTAGTGGGTCACTTGTGTGCGAGTGATGGTCAGCT              | 6297 |
| PX123224  | CGCACCTCCTCCGTGTACTTTGGAACCTCCTAGTGGGTCACTTGTGTGCGAGTGATGGTCAGCT              | 6297 |
| PX245442  | CGCACCTCCTCCGTGTACTTTGGAACCTCCTAGTGGGTCACTTGTGTGCGAGTGATGGTCAGCT<br>*** ***** | 6297 |
| HQ625439  | GTTTAACAGGCCATTTTGGCTTCAAAGGGCTCAGGGAAACAATAATGGTGTGTGCTGGCA                  | 6360 |
| NC_014326 | GTTTAACAGGCCATTTTGGCTTCAAAGGGCTCAGGGAAACAATAATGGTGTGTGCTGGCA                  | 6357 |
| PX123224  | GTTTAACAGGCCATTTTGGCTTCAAAGGGCTCAGGGAAACAATAATGGTGTGTGCTGGCA                  | 6357 |
| PX245442  | GTTTAACAGGCCATTTTGGCTTCAAAGGGCTCAGGGAAACAATAATGGTGTGTGCTGGCA<br>*****         | 6357 |
| HQ625439  | CAATGAGCTCTTTGTTACTGTTGTCGACAACACAAGGAATACAACTTTACTATCTCCCA                   | 6420 |
| NC_014326 | CAATGAGCTCTTTGTTACTGTTGTCGACAACACAAGGAATACAACTTTACTATCTCCCA                   | 6417 |
| PX123224  | CAATGAGCTCTTTGTTACTGTTGTCGACAACACAAGGAATACAACTTTACTATCTCCCA                   | 6417 |
| PX245442  | CAATGAGCTCTTTGTTACTGTTGTCGACAACACAAGGAATACAACTTTACTATCTCCCA<br>*****          | 6417 |
| HQ625439  | GCAAACCAACACACCAAACCCAGATACATATGACTCTACTAATTTTAAGAACTATTTAAG                  | 6480 |
| NC_014326 | GCAAACCAACACACCAAACCCAGATACATATGACTCTACTAATTTTAAAACTATTTAAG                   | 6477 |
| PX123224  | GCAAACCAACACACCAAACCCAGATACATATGACTCTACTAATTTTAAAACTATTTAAG                   | 6477 |
| PX245442  | GCAAACCAACACACCAAACCCAGATACATATGACTCTACTAATTTTAAAACTATTTAAG<br>*****          | 6477 |
| HQ625439  | ACATGTGGAACAATTTGAGCTGTCCCTTATTGCTCAACTGTGTAAGGTTCCACTTGACCC                  | 6540 |
| NC_014326 | ACATGTGGAACAATTTGAGCTGTCCCTTATTGCTCAACTGTGTAAGGTTCCACTTGACCC                  | 6537 |
| PX123224  | ACATGTGGAACAATTTGAGCTGTCCCTTATTGCTCAACTGTGTAAGGTTCCACTTGACCC                  | 6537 |
| PX245442  | ACATGTGGAACAATTTGAGCTGTCCCTTATTGCTCAACTGTGTAAGGTTCCACTTGACCC<br>*****         | 6537 |
| HQ625439  | GGGTGTGCTTGCCCATATAAACACTATGAACCCAACCATCTTGGAGAAGTGGAACTTGGG                  | 6600 |
| NC_014326 | GGGTGTGCTTGCCCATATAAACACTATGAACCCAACCATCTTGGAGAAGTGGAACTTGGG                  | 6597 |
| PX123224  | GGGTGTGCTTGCCCATATAAACACTATGAACCCAACCATCTTGGAGAAGTGGAACTTGGG                  | 6597 |
| PX245442  | GGGTGTGCTTGCCCATATAAACACTATGAACCCAACCATCTTGGAGAAGTGGAACTTGGG<br>*****         | 6597 |

|           |                                                                        |      |
|-----------|------------------------------------------------------------------------|------|
| HQ625439  | TTTTGTACCTCCCCACAGCAGTCCATCTCTGATGACTATAGGTATATAACATCATCGGC            | 6660 |
| NC_014326 | TTTTGTACCTCCCCACAGCAGTCCATCTCTGATGACTATAGGTATATAACATCATCGGC            | 6657 |
| PX123224  | TTTTGTACCTCCCCACAGCAGTCCATCTCTGATGACTATAGGTATATAACATCATCGGC            | 6657 |
| PX245442  | TTTTGTACCTCCCCACAGCAGTCCATCTCTGATGACTATAGGTATATAACATCATCGGC<br>*****   | 6657 |
| HQ625439  | AACTCGCTGTCCAGATCAGAATCCGCCAAGGAAAGAGAGGATCCTTACAAGGGTCTTAT            | 6720 |
| NC_014326 | AACTCGCTGTCCAGATCAGAATCCGCCAAGGAAAGAGAGGATCCTTACAAGGGTCTTAT            | 6717 |
| PX123224  | AACTCGCTGTCCAGATCAGAATCCGCCAAGGAAAGAGAGGATCCTTACAAGGGTCTTAT            | 6717 |
| PX245442  | AACTCGCTGTCCAGATCAGAATCCGCCAAGGAAAGAGAGGATCCTTACAAGGGTCTTAT<br>*****   | 6717 |
| HQ625439  | ATTTTGGGAAGTTGATCTTACTGAGAGGTTTCTCAGGACCTTGATCAGTTTGCTCTGGG            | 6780 |
| NC_014326 | ATTTTGGGAAGTTGATCTTACTGAGAGGTTTCTCAGGACCTTGATCAGTTTGCTCTGGG            | 6777 |
| PX123224  | ATTTTGGGAAGTTGATCTTACTGAGAGGTTTCTCAGGACCTTGATCAGTTTGCTCTGGG            | 6777 |
| PX245442  | ATTTTGGGAAGTTGATCTTACTGAGAGGTTTCTCAGGACCTTGATCAGTTTGCTCTGGG<br>*****   | 6777 |
| HQ625439  | ACGAAAGTTTCTGTATCAAGCTGGTATACGTACTGCTGTACGGGCCGCGGGGTCAAAAG            | 6840 |
| NC_014326 | ACGAAAGTTTCTGTATCAAGCTGGTATACGTACTGCTGTACGGGCCGCGGGGTCAAAAG            | 6837 |
| PX123224  | ACGAAAGTTTCTGTATCAAGCTGGTATACGTACTGCTGTACGGGCCGCGGGGTCAAAAG            | 6837 |
| PX245442  | ACGAAAGTTTCTGTATCAAGCTGGTATACGTACTGCTGTACGGGCCGCGGGGTCAAAAG<br>*****   | 6837 |
| HQ625439  | GGCAGCGTCTACAACCTCTGCGTCTTCTAGACGAGTTGTA AAAAGGAAGAGGGGAAGCAA          | 6900 |
| NC_014326 | GGCAGCGTCTACAACCTCTGCGTCTTCTAGACGAGTTGTA AACGGAAGAGGGGAAGCAA           | 6897 |
| PX123224  | GGCAGCGTCTACAACCTCTGCGTCTTCTAGACGAGTTGTA AACGGAAGAGGGGAAGCAA           | 6897 |
| PX245442  | GGCAGCGTCTACAACCTCTGCGTCTTCTAGACGAGTTGTA AACGGAAGAGGGGAAGCAA<br>*****  | 6897 |
| HQ625439  | ATAACTGAACTGGTGCTACTAACTGAATTTGGTGCTATGACTCCGGTATTATGAAGTTCT           | 6960 |
| NC_014326 | ATAACTGAACTGGTGCTACTAACTGAA-----TGACTCCGGTATTATGAAGTTCT                | 6947 |
| PX123224  | ATAACTGAACTGGTGCTACTAACTGAA-----TGACTCCGGTATTATGAAGTTCT                | 6947 |
| PX245442  | ATAACTGAACTGGTGCTACTAACTGAA-----TGACTCCGGTATTATGAAGTTCT<br>*****       | 6947 |
| HQ625439  | TGTATTGTATAACTGTTTACTGGGGGCTTACTGTGTATAGGGGGCTTGAGTTGTTGTCT            | 7020 |
| NC_014326 | TGTATTGTATAACTGTTTACTGGGGGCTTACTGTGTATAGGGGGCTTGAGTTGTTGTCT            | 7007 |
| PX123224  | TGTATTGTATAACTGTTTACTGGGGGCTTACTGTGTATAGGGGGCTTGAGTTGTTGTCT            | 7007 |
| PX245442  | TGTATTGTATAACTGTTTACTGGGGGCTTACTGTGTATAGGGGGCTTGAGTTGTTGTCT<br>*****   | 7007 |
| HQ625439  | GTTCTTGTCATGTCCTTGTGATGTACTTTTGCAACTTAAATAAATGACTAATGCTGACC            | 7080 |
| NC_014326 | GTTCTTGTCATGTCCTTGTGATGTACTTTTGCAACTTAAATAAATGACTAATGCTGACC            | 7067 |
| PX123224  | GTTCTTGTCATGTCCTTGTGATGTACTTTTGCAACTTAAATAAATGACTAATGCTGACC            | 7067 |
| PX245442  | GTTCTTGTCATGTCCTTGTGATGTACTTTTGCAACTTAAATAAATGACTAATGCTGACC<br>*****   | 7067 |
| HQ625439  | AGTGTGCCTCGCCTCATTCCTTACGCTCGCACCTGGGCTCAGTTTGTGCCAGACTGTCATA          | 7140 |
| NC_014326 | AGTGTGCCTCGCCTCATTCCTTTAGCTCGCACCTGGGCTCAGTTTGTGCCAGACTGTCATA          | 7127 |
| PX123224  | AGTGTGCCTCGCCTCATTCCTTTAGCTCGCACCTGGGCTCAGTTTGTGCCAGACTGTCATA          | 7127 |
| PX245442  | AGTGTGCCTCGCCTCATTCCTTTAGCTCGCACCTGGGCTCAGTTTGTGCCAGACTGTCATA<br>***** | 7127 |
| HQ625439  | ACAAACAGTCTCTGTTGGCTGTGTGCTCTCTAATTTCTGAAAAGACGTGTTTGACGAA             | 7200 |
| NC_014326 | ACAAACAGTCTCTGTTGGCTGTGTGCTCTCTAATTTCTGAAAAGACGTGTTTGACGAA             | 7187 |
| PX123224  | ACAAACAGTCTCTGTTGGCTGTGTGCTCTCTAATTTCTGAAAAGACGTGTTTGACGAA             | 7187 |
| PX245442  | ACAAACAGTCTCTGTTGGCTGTGTGCTCTCTAATTTCTGAAAAGACGTGTTTGACGAA<br>*****    | 7187 |

|           |                                                                        |      |
|-----------|------------------------------------------------------------------------|------|
| HQ625439  | GGACCGTTTTTCGGTCGGGCGCCAGTATCAGCATAAACTCCAGCCAATTTGGCCAAGGTAA          | 7260 |
| NC_014326 | GGACCGTTTTTCGGTCGGGCGCCAGTATCAGCATAAACTCCAGCCAATTTGGCCAAGGTAA          | 7247 |
| PX123224  | GGACCGTTTTTCGGTCGGGCGCCAGTATCAGCATAAACTCCAGCCAATTTGGCCAAGGTAA          | 7247 |
| PX245442  | GGACCGTTTTTCGGTCGGGCGCCAGTATCAGCATAAACTCCAGCCAATTTGGCCAAGGTAA<br>***** | 7247 |
| HQ625439  | GGAAATGACTAACTGTCTTGGAACAGATGCGTGTCTTGCCAATTATCCGCGTACCGTTTT           | 7320 |
| NC_014326 | GGAAATGACTAACTGTCTTGGAACAGATGCGTGTCTTGCCAATTATCCGCGTACCGTTTT           | 7307 |
| PX123224  | GGAAATGACTAACTGTCTTGGAACAGATGCGTGTCTTGCCAATTATCCGCGTACCGTTTT           | 7307 |
| PX245442  | GGAAATGACTAACTGTCTTGGAACAGATGCGTGTCTTGCCAATTATCCGCGTACCGTTTT<br>*****  | 7307 |
| HQ625439  | CGGTCGGGTAAAAAGGCGCCAAGCTAAGCATGATTGAGTTCATTGTGTCTTGCCAA               | 7380 |
| NC_014326 | CGGTCGGGTAAAAAGGCGCCAAGCTAAGCATGATTGAGTTCATTGTGTCTTGCCAA               | 7367 |
| PX123224  | CGGTCGGGTAAAAAGGCGCCAAGCTAAGCATGATTGAGTTCATTGTGTCTTGCCAA               | 7367 |
| PX245442  | CGGTCGGGTAAAAAGGCGCCAAGCTAAGCATGATTGAGTTCATTGTGTCTTGCCAA<br>*****      | 7367 |
| HQ625439  | GTACAGGTGTGGTGTCTTGGAACGGTCGTACAATTAATCTTTGAGCTGATGGTTGGCAAC           | 7440 |
| NC_014326 | GTACAGGTGTGGTGTCTTGGAACGGTCGTACAATTAATCTTTGAGCTGATGGTTGGCAAC           | 7427 |
| PX123224  | GTACAGGTGTGGTGTCTTGGAACGGTCGTACAATTAATCTTTGAGCTGATGGTTGGCAAC           | 7427 |
| PX245442  | GTACAGGTGTGGTGTCTTGGAACGGTCGTACAATTAATCTTTGAGCTGATGGTTGGCAAC<br>*****  | 7427 |
| HQ625439  | AATTATTTCCCTCTGAAAAAATTTAGGTGGAGCGGGAACGGTCGCATATAAGTATCAGTG           | 7500 |
| NC_014326 | AATTATTTCCCTCTGAAAAAATTTAGGTGGAGCGGGAACGGTCGCATATAAGTATCAGTG           | 7487 |
| PX123224  | AATTATTTCCCTCTGAAAAAATTTAGGTGGAGCGGGAACGGTCGCATATAAGTATCAGTG           | 7487 |
| PX245442  | AATTATTTCCCTCTGAAAAAATTTAGGTGGAGCGGGAACGGTCGCATATAAGTATCAGTG<br>*****  | 7487 |
| HQ625439  | TGCCCCCATGACCGTATTCGTTT                                                | 7523 |
| NC_014326 | TGCCCCCATAACCGTATTCGTTT                                                | 7510 |
| PX123224  | TGCCCCCATAACCGTATTCGTTT                                                | 7510 |
| PX245442  | TGCCCCCATAACCGTATTCGTTT<br>*****                                       | 7510 |
